# Supplementary material for: Exploring the reactivity of homoleptic organozincs towards SO2: synthesis and structure of a homologous series of organozinc sulfinates
Source: Royal Society of Chemistry journal article supplement (doi:10.1039/d2dt00577h), 2022-01-01
Supplement: d2dt00577h1.pdf [file d2dt00577h1.pdf]

## Supporting Information for

### Exploring the reactivity of homoleptic organozinc compounds towards SO<sub>2</sub>

Adam Tulewicz,\*<sup>a</sup> Vadim Szejko,<sup>b</sup> Iwona Justyniak,<sup>a</sup> Małgorzata Wolska-Pietkiewicz<sup>b</sup> and  
Janusz Lewiński<sup>\*a,b</sup>

<sup>a</sup> Institute of Physical Chemistry, Polish Academy of Sciences, Kasprzaka 44/52, 01-224  
Warsaw, Poland

<sup>b</sup> Department of Chemistry, Warsaw University of Technology, Noakowskiego 3, 00-664  
Warsaw, Poland

\* E-mail: atulewicz@ichf.edu.pl; lewin@ch.pw.edu.pl

### Table of Contents

- I NMR & IR spectra
- II Diffusivity measurement
- III X-ray structure determination
- IV Theoretical section

## I. NMR & IR spectra

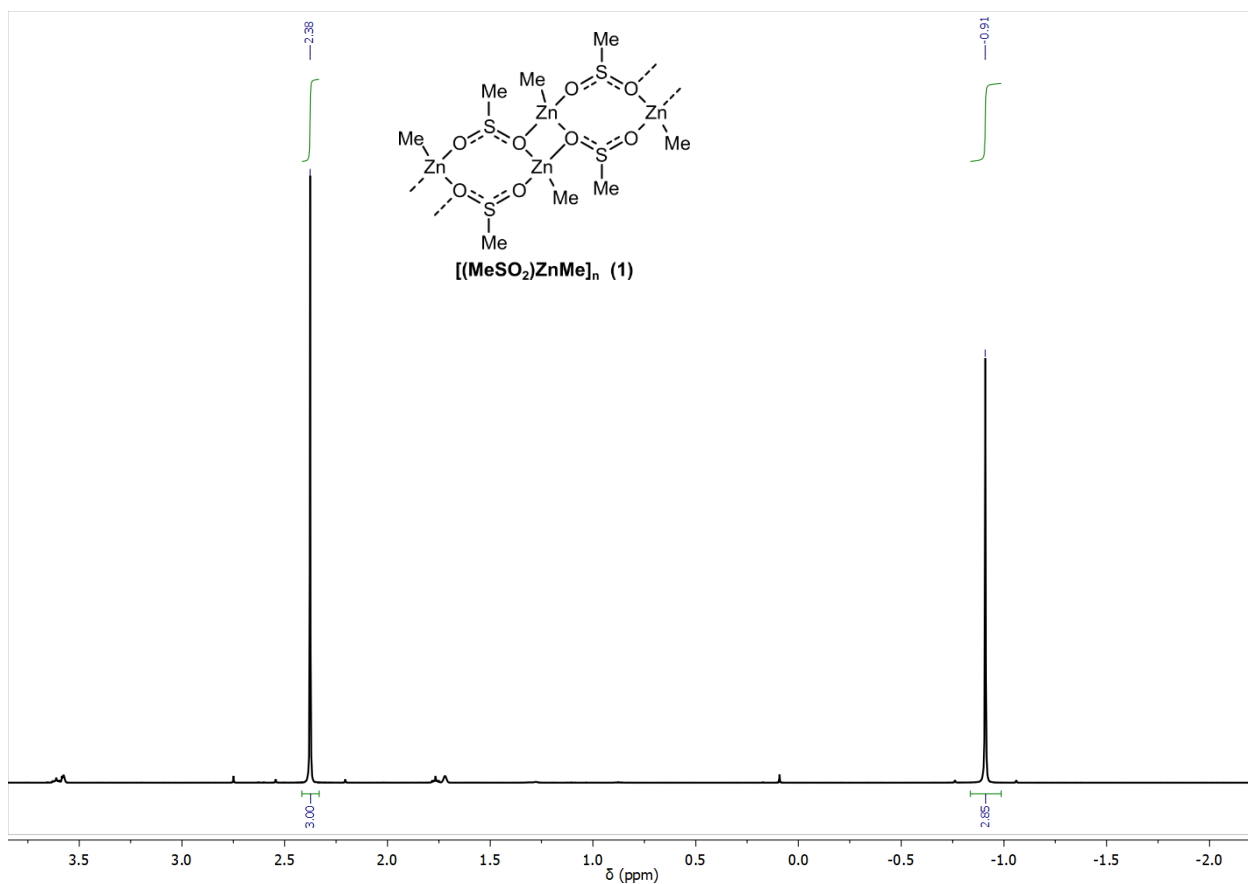

Figure S1.  $^1\text{H}$  NMR (400 MHz,  $\text{THF-}d_8$ ) spectrum of  $[(\text{MeSO}_2\text{ZnMe})_n]$  (1).

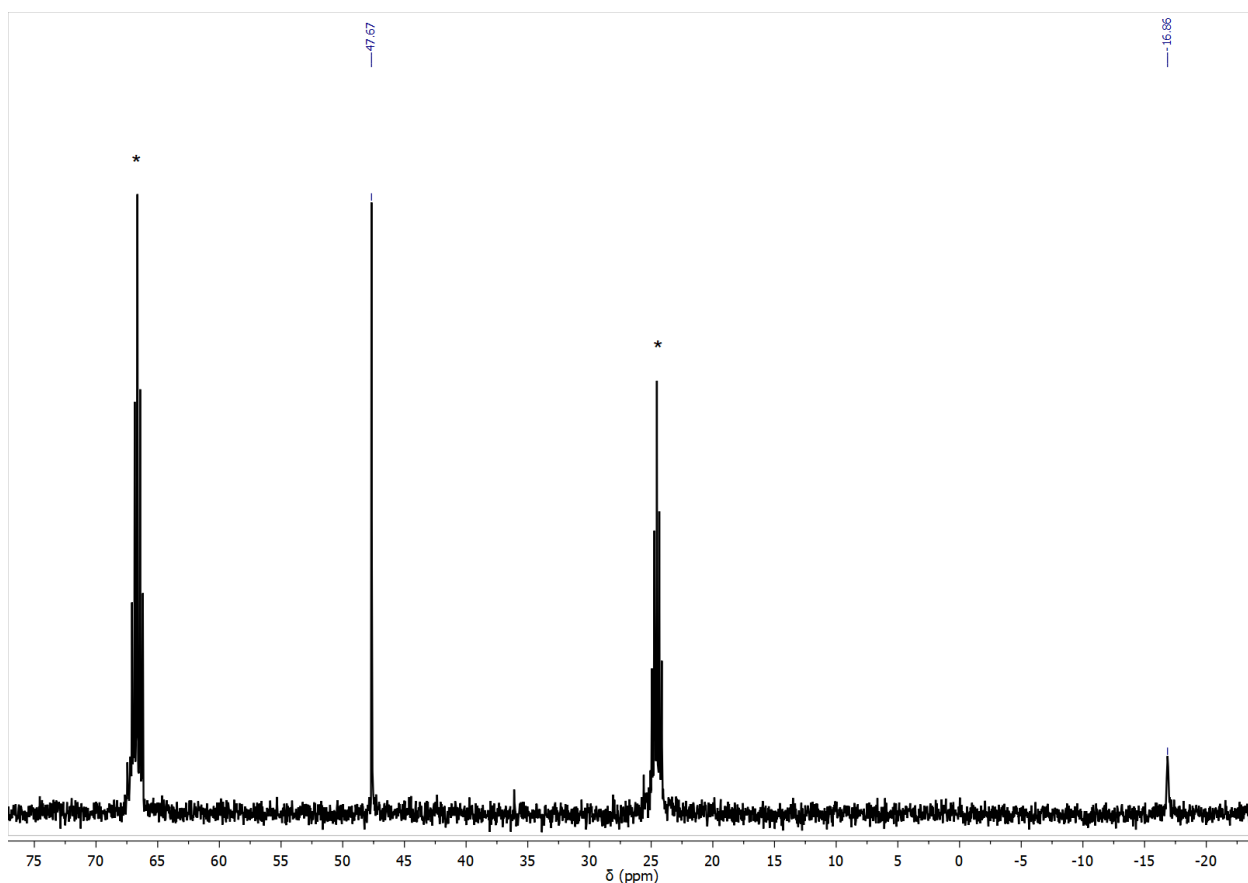

Figure S2.  $^{13}\text{C}$  NMR (101 MHz,  $\text{THF-}d_8$ ) spectrum of  $[(\text{MeSO}_2\text{ZnMe})_n]$  (1). \* -  $\text{THF-}d_8$ .

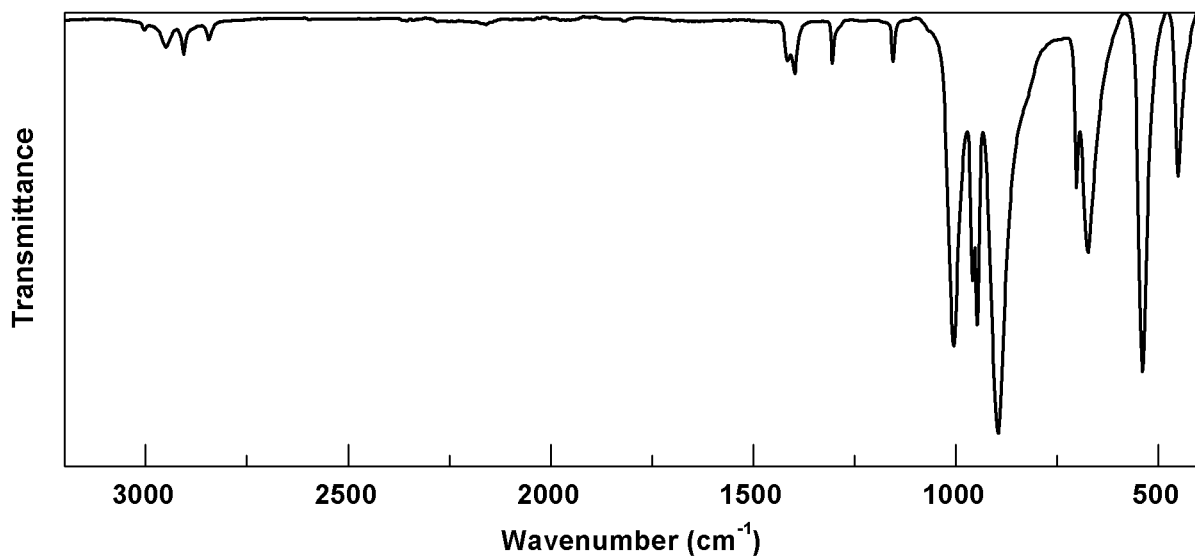

Figure S3. IR (ATR) spectrum of  $[(\text{MeSO}_2\text{ZnMe})_2]_n$  (1).

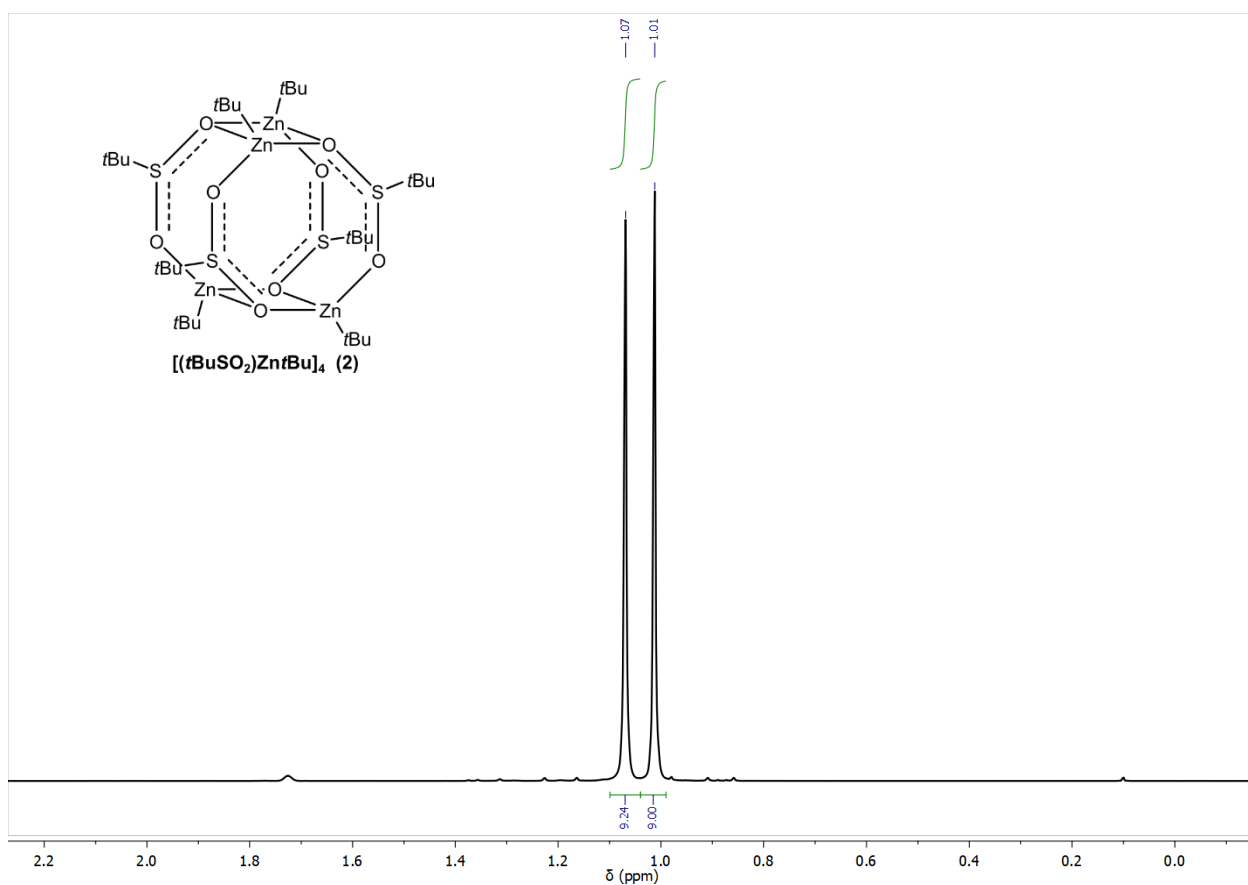

Figure S4.  $^1\text{H}$  NMR (400 MHz,  $\text{THF-}d_8$ ) spectrum of  $[\text{tBuSO}_2\text{Zn}(\text{tBu})_4]$  (2).

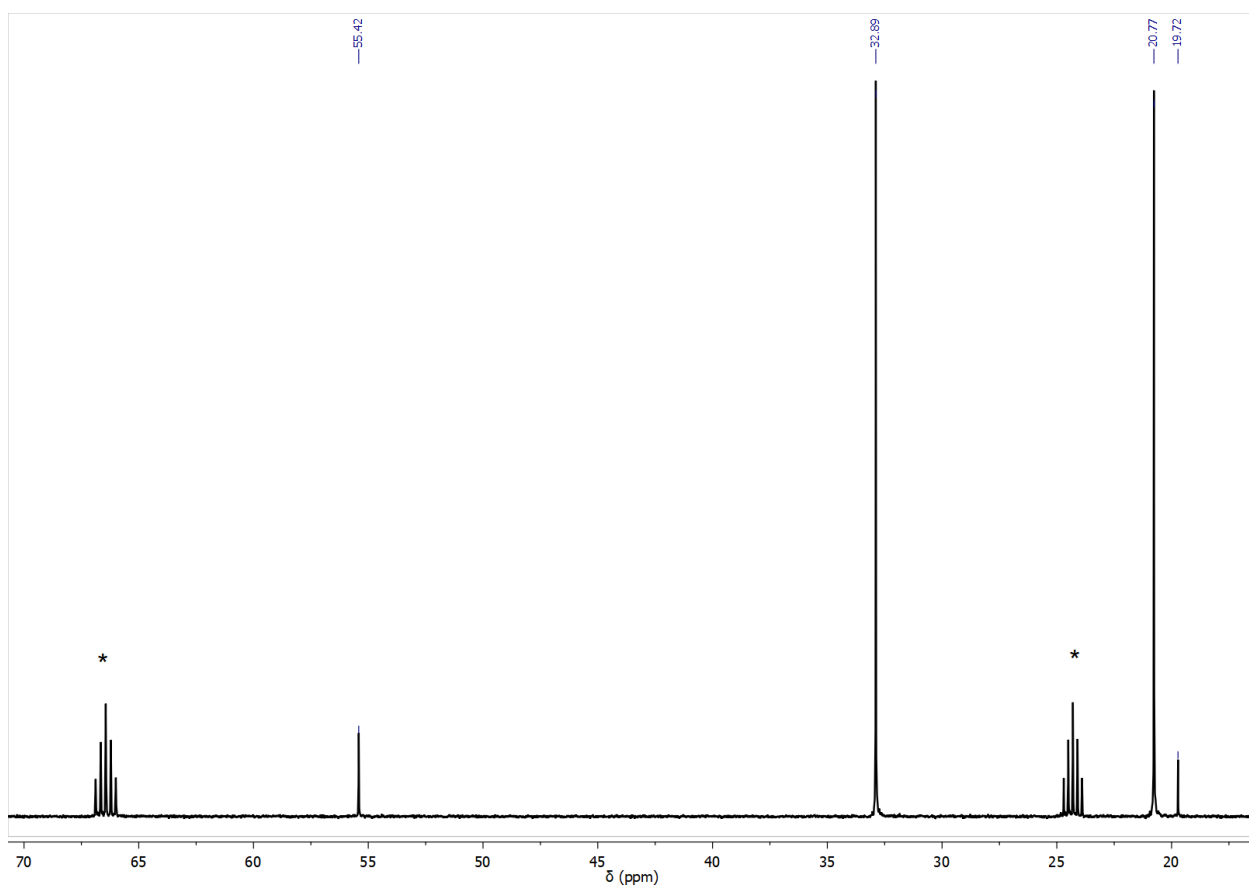

Figure S5.  $^{13}\text{C}$  NMR (101 MHz,  $\text{THF-}d_8$ ) spectrum of  $[\text{tBuSO}_2\text{ZnEtBu}]_4$  (2). \* -  $\text{THF-}d_8$ .

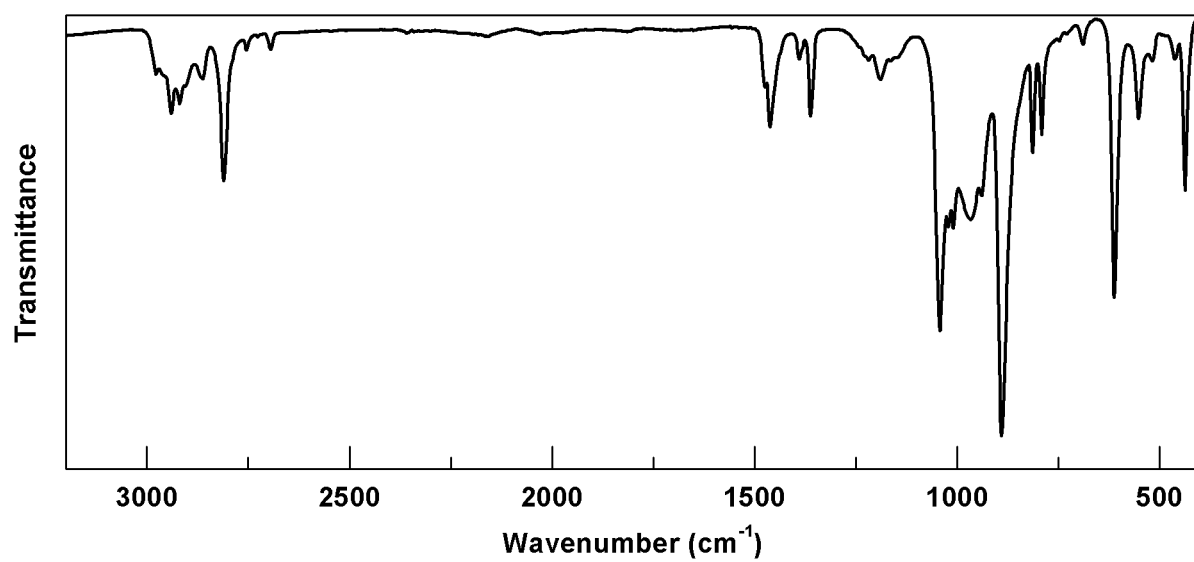

Figure S6. IR (ATR) spectrum of  $[\text{tBuSO}_2\text{ZnEtBu}]_4$  (2).

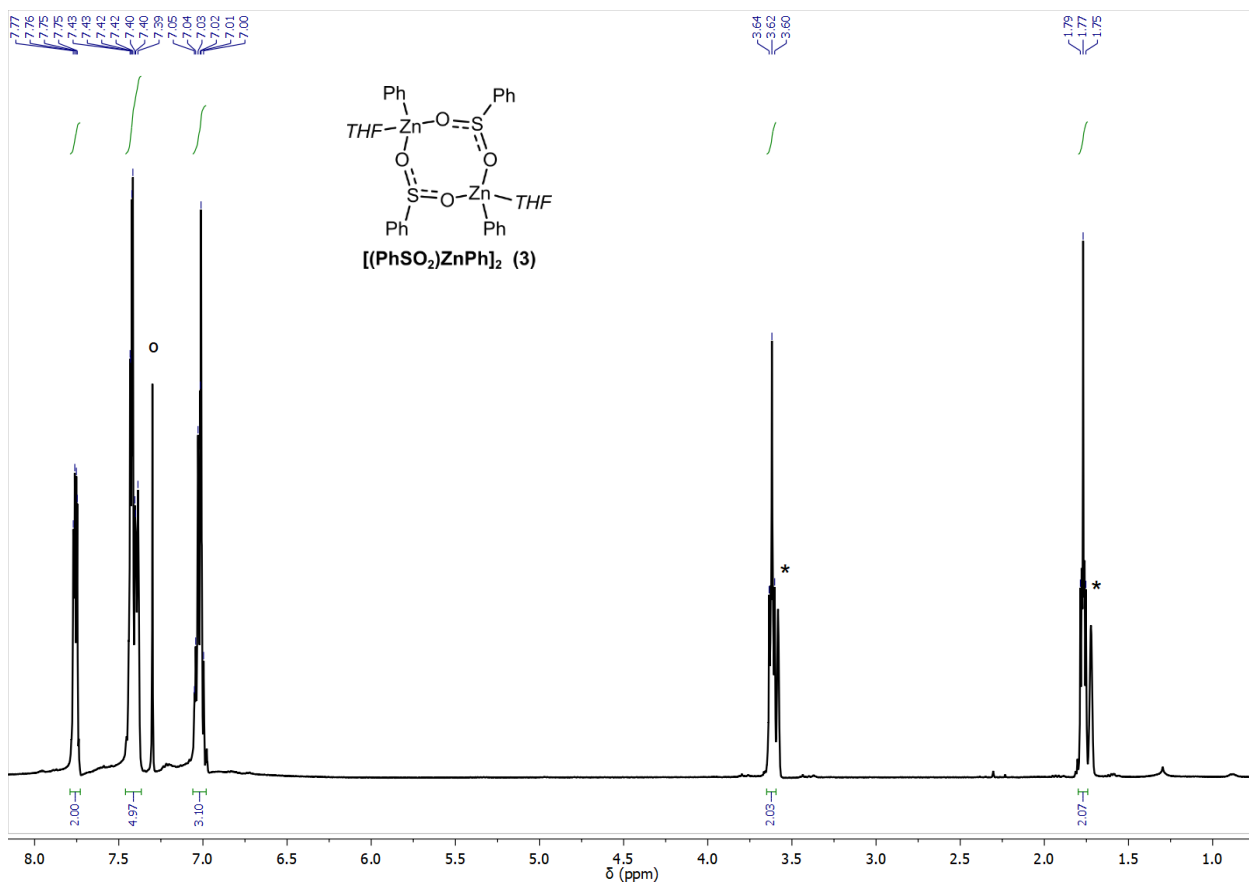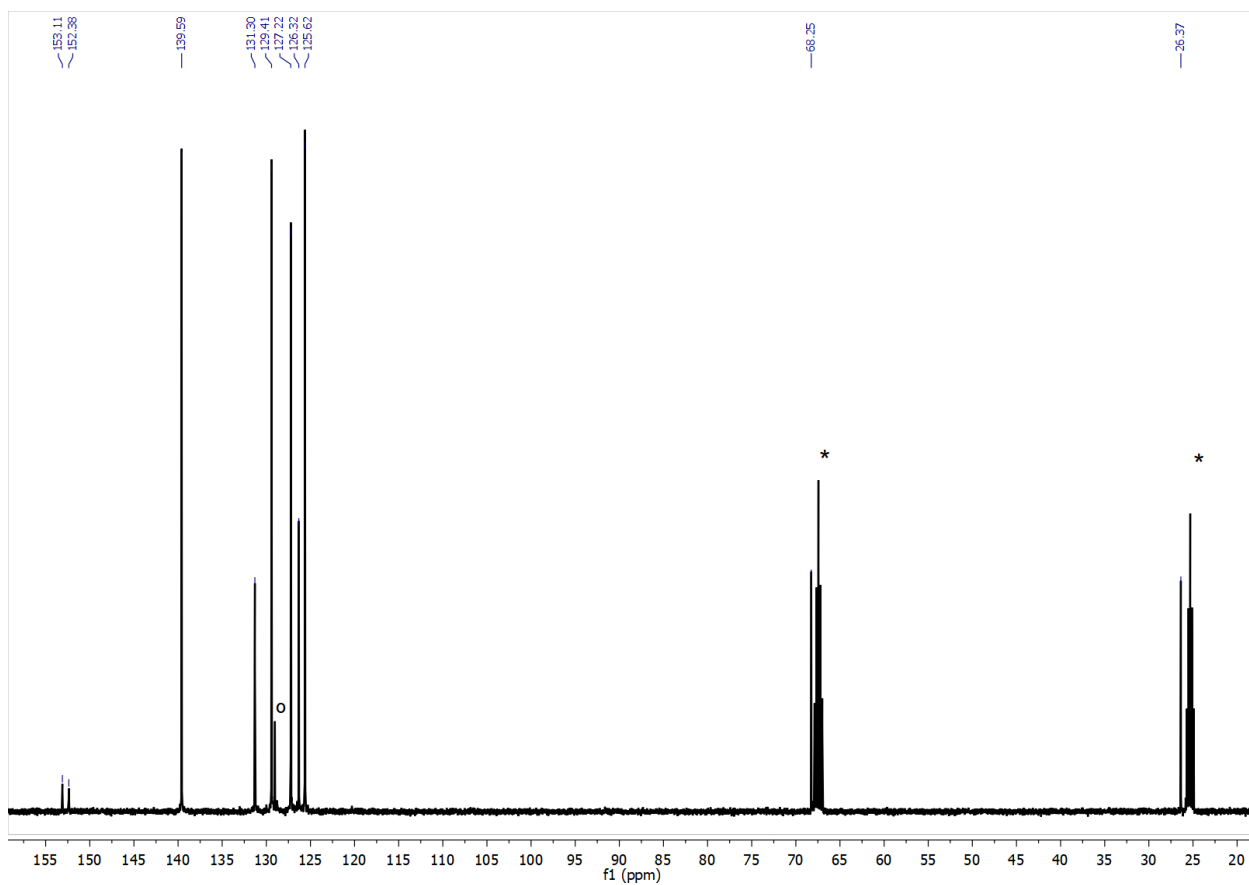

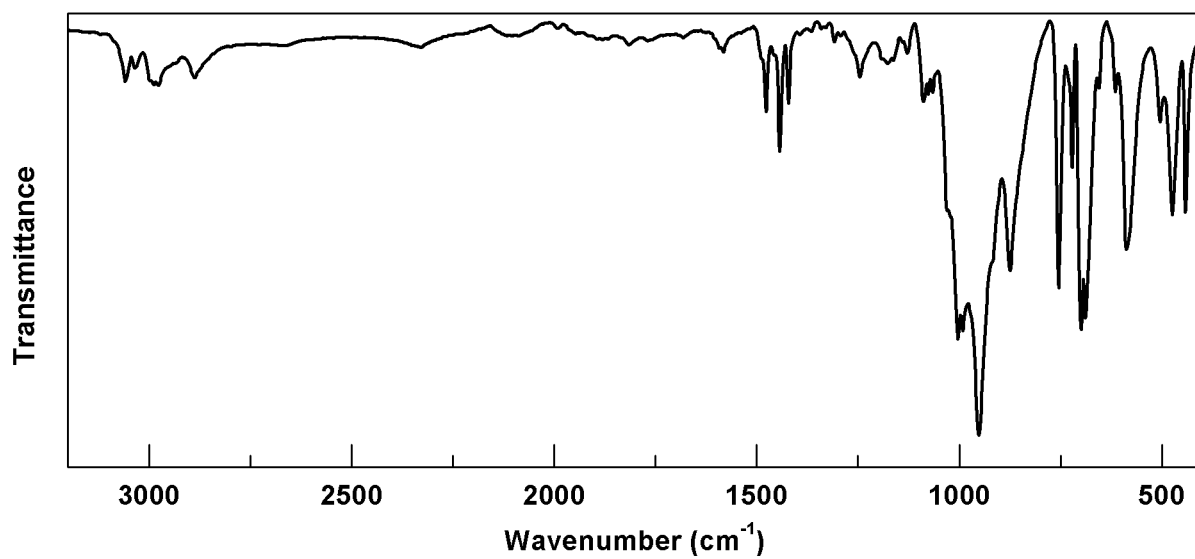

**Figure S9.** IR (ATR) spectrum of  $[(\text{PhSO}_2)\text{ZnPh}]_2 \cdot 2\text{THF}$  (**3**).

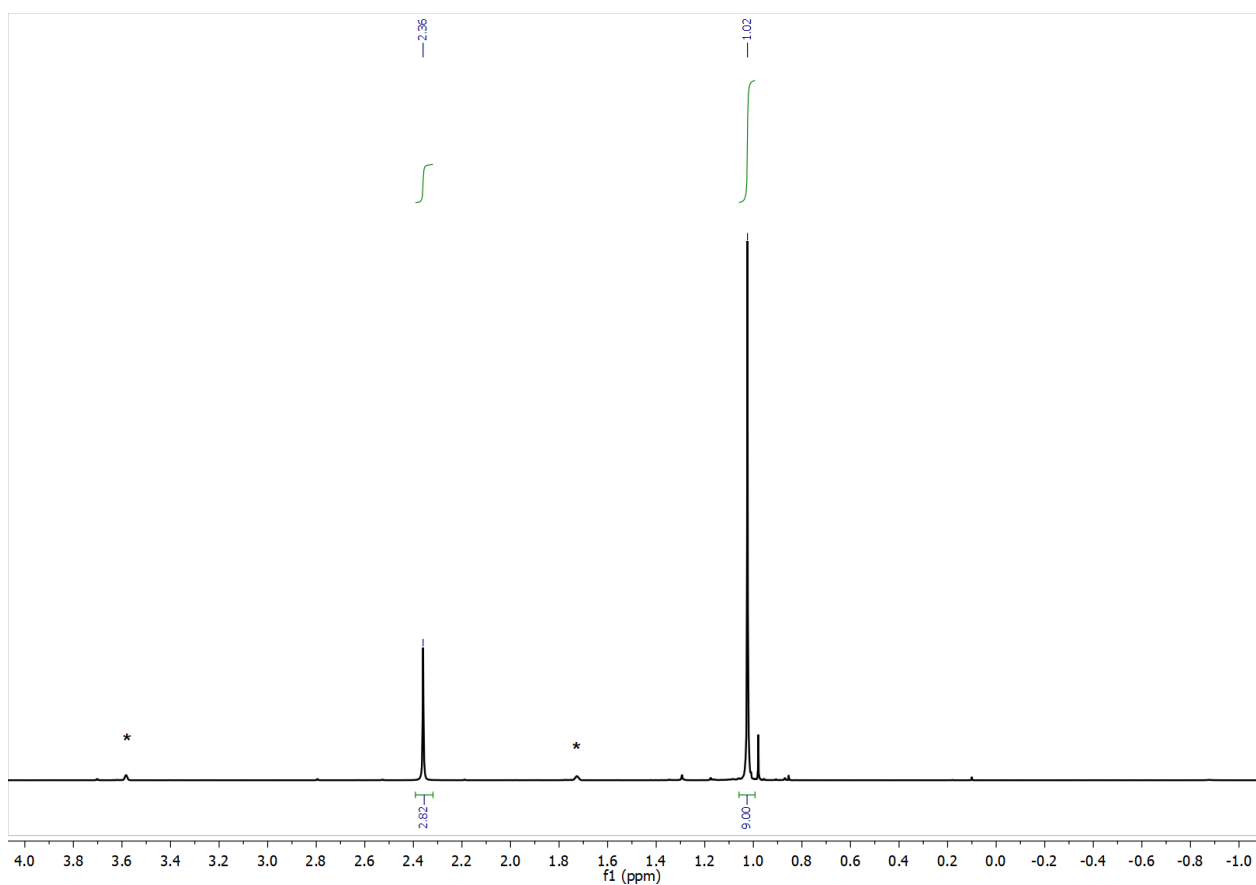

**Figure S10.**  $^1\text{H}$  NMR (400 MHz,  $\text{THF-}d_8$ ) spectrum of the equimolar mixture of **1** and  $t\text{Bu}_2\text{Zn}$ . \* -  $\text{THF-}d_8$ .

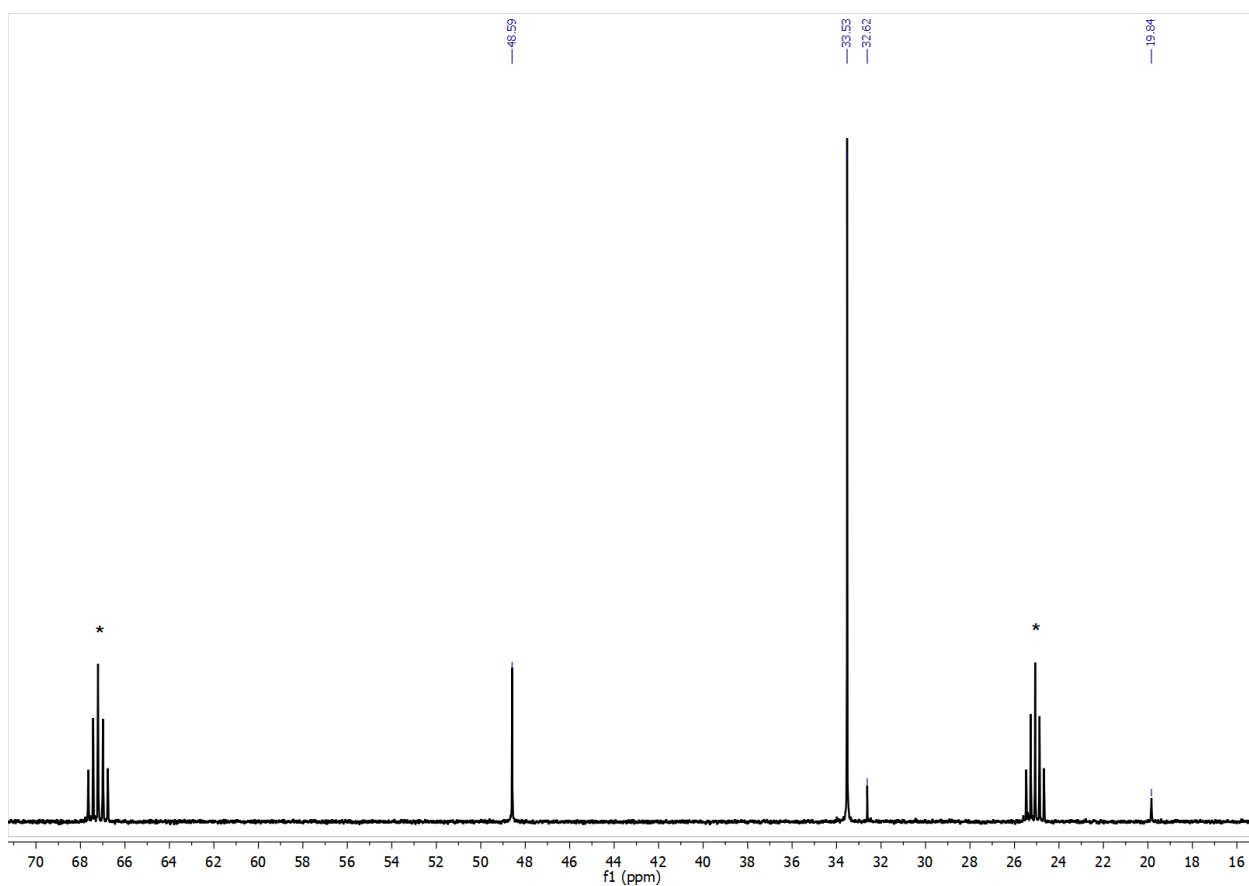

**Figure S11.**  $^{13}\text{C}$  NMR (101 MHz,  $\text{THF-}d_8$ ) spectrum of the equimolar mixture between **1** and  $t\text{Bu}_2\text{Zn}$ . \* -  $\text{THF-}d_8$ .

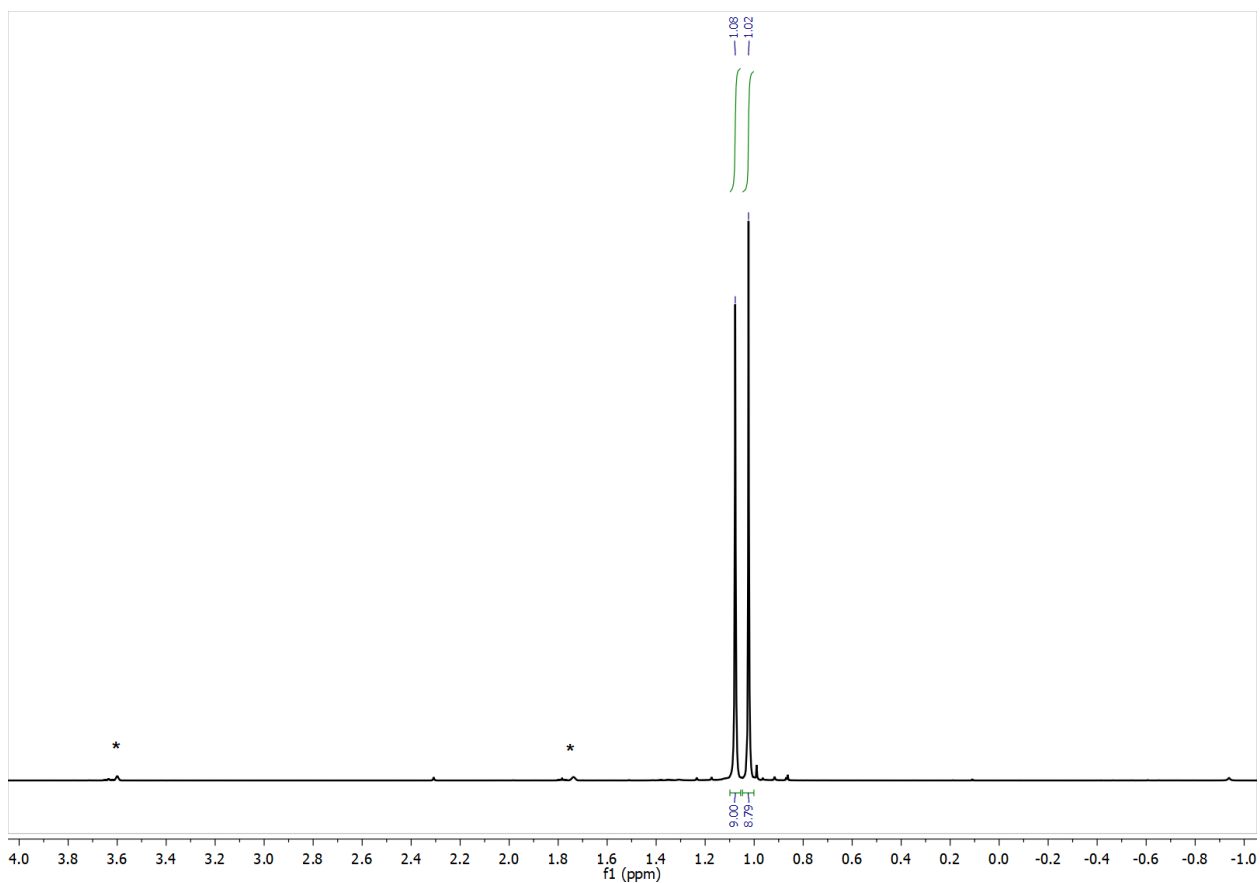

**Figure S12.**  $^1\text{H}$  NMR (400 MHz,  $\text{THF-}d_8$ ) spectrum of the equimolar mixture between **2** and  $\text{Me}_2\text{Zn}$ . \* -  $\text{THF-}d_8$ .

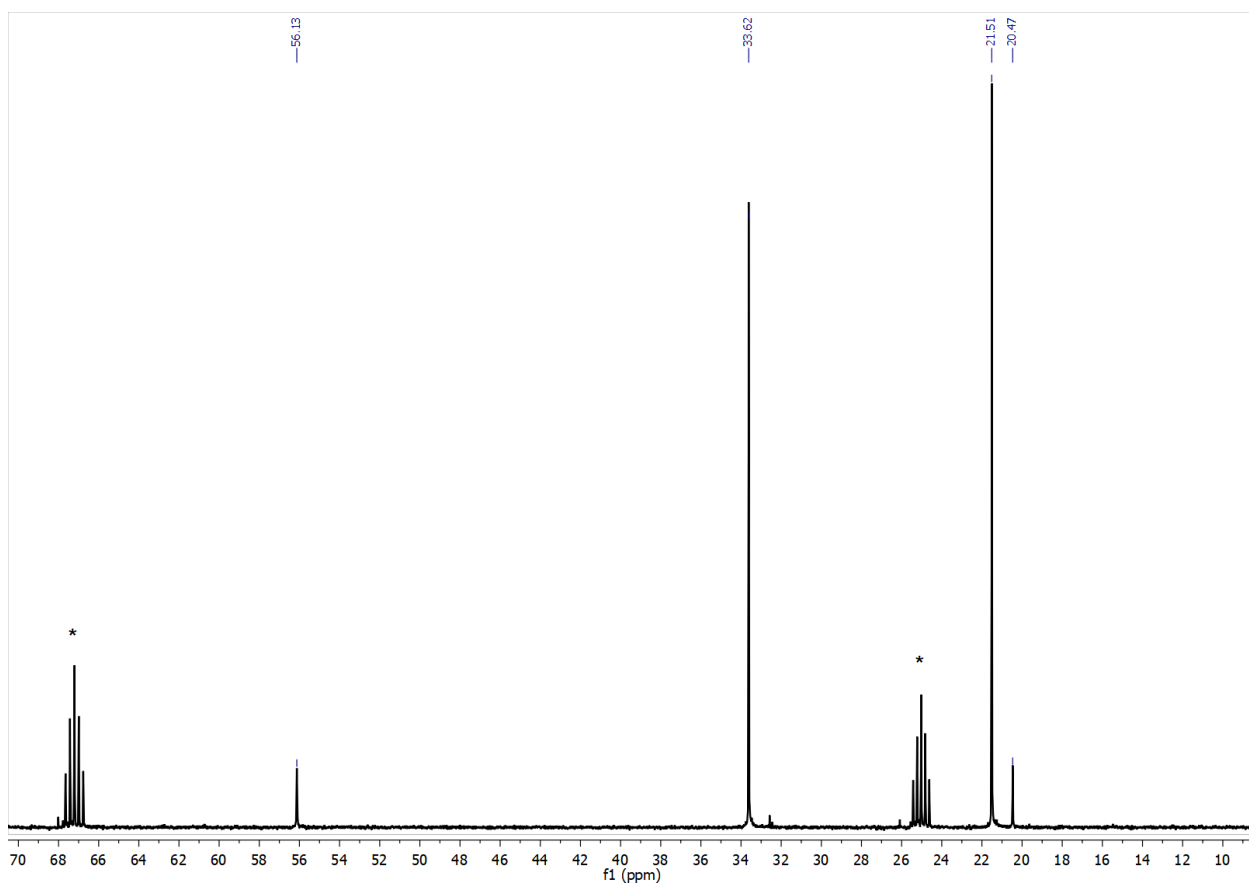

**Figure S13.**  $^{13}\text{C}$  NMR (101 MHz,  $\text{THF-}d_8$ ) spectrum of the equimolar mixture between **2** and  $\text{Me}_2\text{Zn}$ . \* -  $\text{THF-}d_8$ .



## II. Diffusivity measurement

The DOSY spectra were acquired on Bruker AVANCE II 300 MHz spectrometer at 298 K. Pulsed field gradient double stimulated echo convection-compensated (PFGSTE) sequence with total of 16 diffusion encoding bipolar gradients (ranging from 3 to 48 G/cm, smoothed-square shaped, equal steps in gradient squared) was used and the total width of the gradient pulse was optimized to achieve attenuation of about 90% of the initial intensity of the signals. Overall, the key acquisition parameters were as follows: total length of gradient encoding pulses gradient - 2ms, diffusion delay - 150ms, gradient recovery delay - 0.1ms, relaxation delay - 2.8s. Steady-state scans in number of 4 were performed prior to acquisition of the data. Raw data was processed with powerful DOSY Toolbox which is extensively described in its author's paper.<sup>[i]</sup> Samples were dissolved in dry and degassed THF-*d*<sub>8</sub> at concentration *ca.* 15mM. The molecular masses of analyzed compounds were estimated utilizing an external calibration curve (ECC) approach with normalized diffusion coefficients, with 9-methylanthracene (9-MeA; MW = 192) as an internal reference.<sup>[ii,iii]</sup> Moreover, we have applied the van-der-Waals radii-based correction in order to account for the underestimation of MW due to the presence of heavy atoms, according to the literature methods.<sup>[iv]</sup>

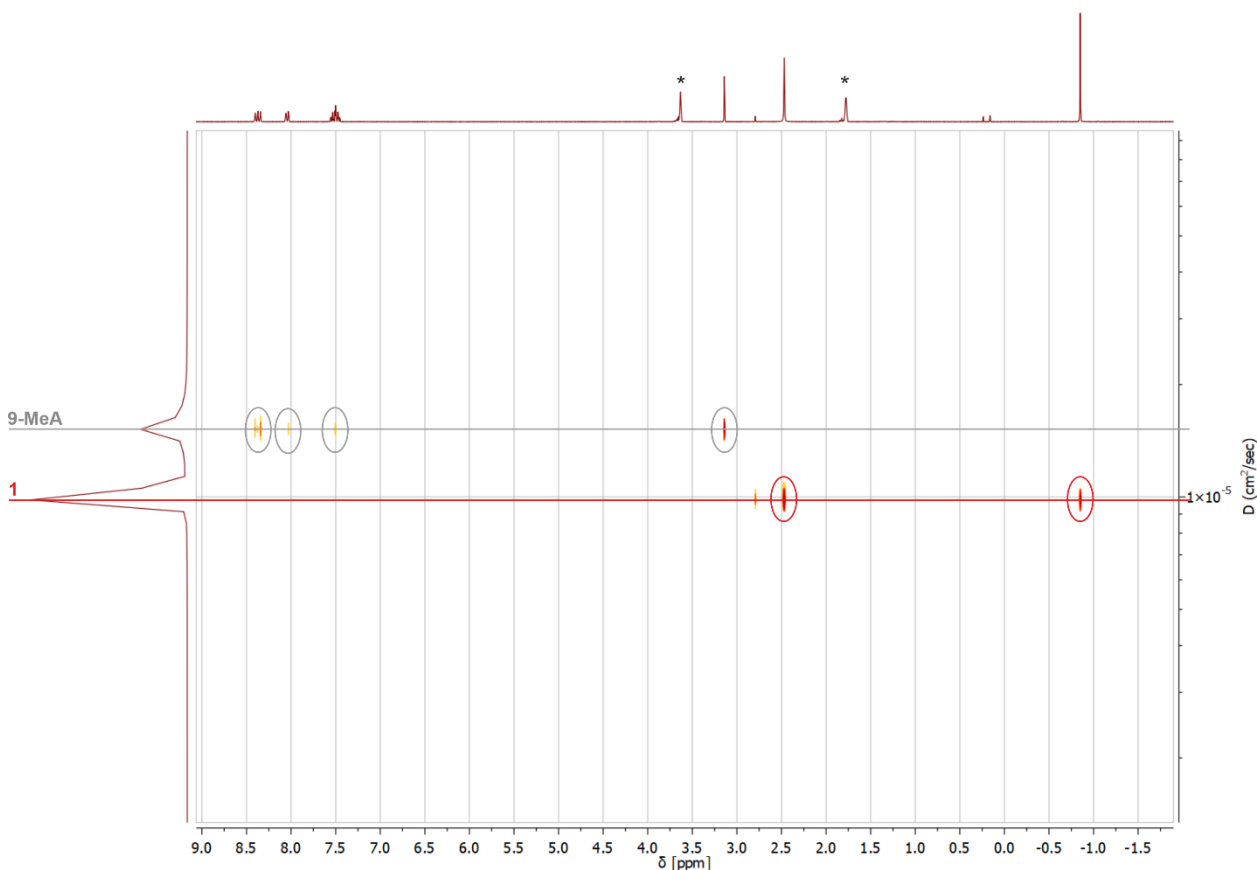

**Figure S14.** 2D DOSY-NMR spectrum of **1** in THF-*d*<sub>8</sub>; \* - residual solvent peaks.

**Table S1.** Diffusion coefficient of **1** and its estimated molecular weight.

|                                                                            |       |
|----------------------------------------------------------------------------|-------|
| $D_{av}(9\text{-MeA}) \cdot 10^9 \text{ m}^2/\text{s}$                     | 1.567 |
| $D_{av}(\mathbf{1}) \cdot 10^9 \text{ m}^2/\text{s}$                       | 1.012 |
| $MW_{calc} (\{[(\text{MeSO}_2)\text{ZnMe}](\text{THF-}d_8)\}) / \text{Da}$ | 239.7 |
| $MW_{est}(\mathbf{1}) / \text{Da}$                                         | 519   |
| n                                                                          | 2.2   |

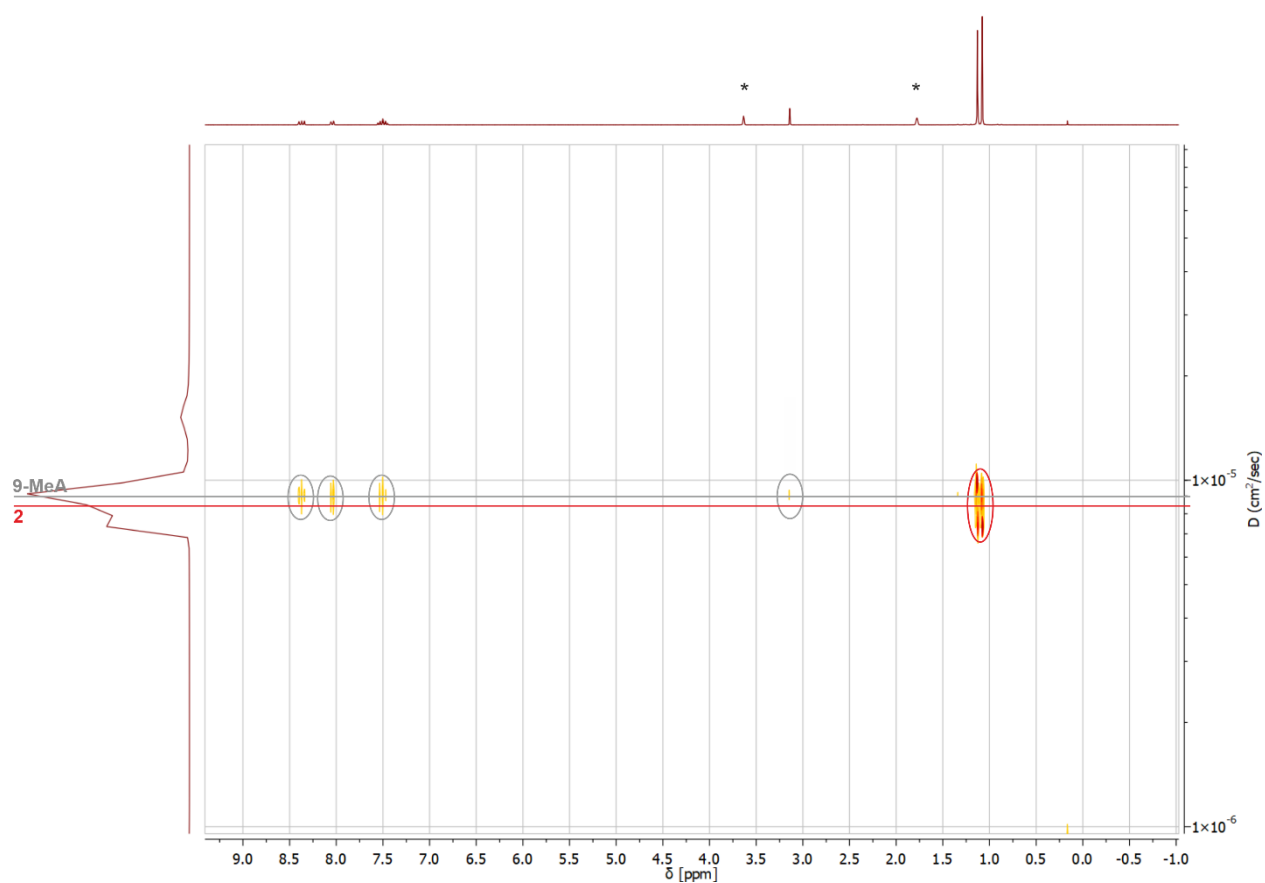

**Figure S15.** 2D DOSY-NMR spectrum of **2** in THF- $d_8$ .

**Table S2.** Diffusion coefficient of **2** and its estimated molecular weight.

|                                                                                       |       |
|---------------------------------------------------------------------------------------|-------|
| $D_{\text{av}}(9\text{-MeA}) \cdot 10^9 \text{ m}^2/\text{s}$                         | 1.577 |
| $D_{\text{av}}(\mathbf{2}) \cdot 10^9 \text{ m}^2/\text{s}$                           | 0.865 |
| $MW_{\text{calc}}(\{(t\text{BuSO}_2)\text{Zn}t\text{Bu}\}(\text{THF-}d_8))/\text{Da}$ | 323.8 |
| $MW_{\text{est}}(\mathbf{2})/\text{Da}$                                               | 610   |
| n                                                                                     | 1.9   |

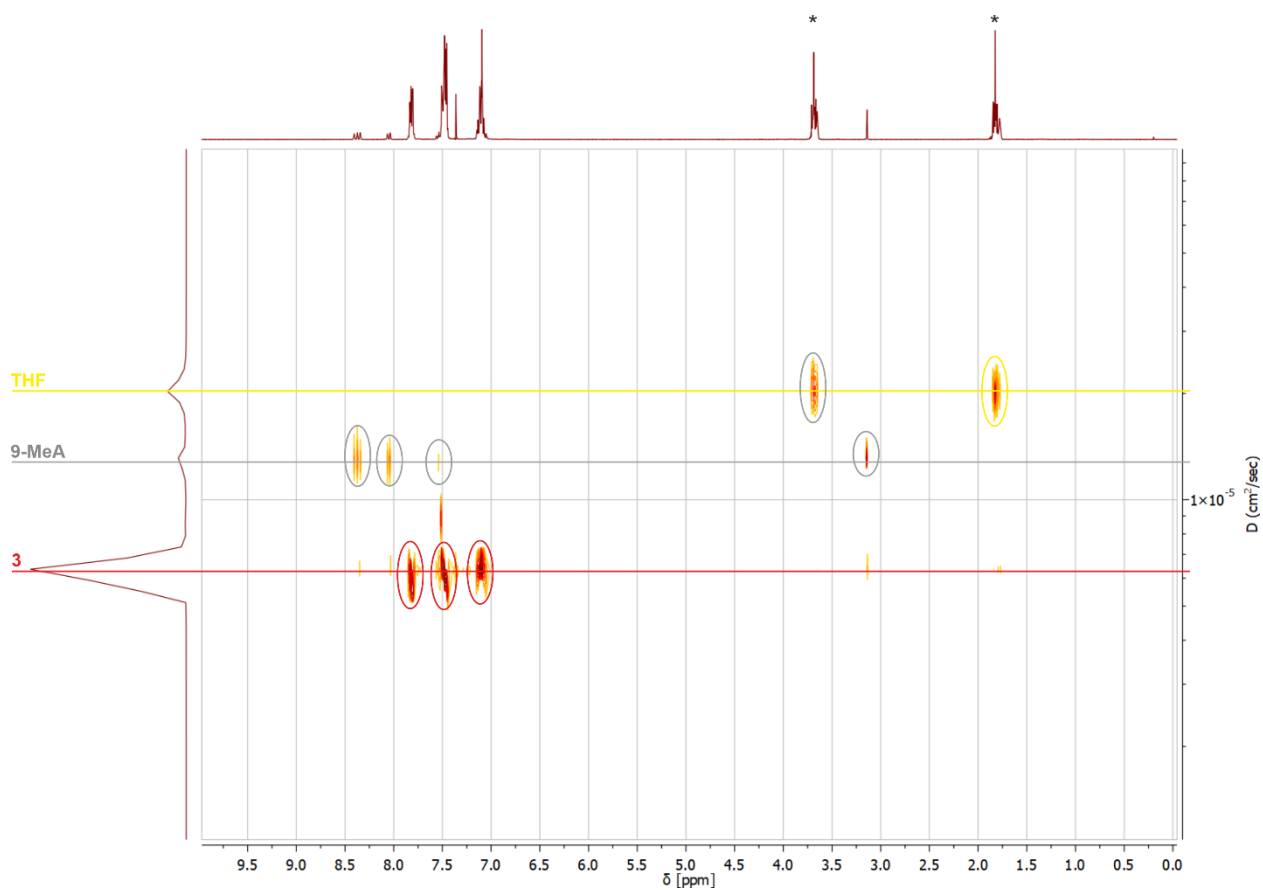

**Figure S16.** 2D DOSY-NMR spectrum of **3** in THF- $d_8$ .

**Table S3.** Diffusion coefficient of **3** and its estimated molecular weight.

|                                                                                  |             |
|----------------------------------------------------------------------------------|-------------|
| $D_{\text{av}}(9\text{-MeA}) \cdot 10^9 \text{ m}^2/\text{s}$                    | 1.567       |
| $D_{\text{av}}(\mathbf{3}) \cdot 10^9 \text{ m}^2/\text{s}$                      | 0.628       |
| $MW_{\text{calc}}(\{[(\text{PhSO}_2)\text{ZnPh}](\text{THF-}d_8)\}) / \text{Da}$ | 363.8       |
| $MW_{\text{est}}(\mathbf{3}) / \text{Da}$                                        | 821         |
| <b>n</b>                                                                         | <b>2.25</b> |
| $D_{\text{av}}(\text{THF}) \cdot 10^9 \text{ m}^2/\text{s}$                      | 2.090       |
| $MW_{\text{calc}}(\text{THF}) / \text{Da}$                                       | 72          |
| $MW_{\text{est}}(\text{THF}) / \text{Da}$                                        | 85          |

### III. X-ray structure determination

#### Crystal data for 1

**Table S4.** Crystal data and structure refinement for 1.

|                                   |                                                  |                  |
|-----------------------------------|--------------------------------------------------|------------------|
| Empirical formula                 | C <sub>2</sub> H <sub>6</sub> O <sub>2</sub> SZn |                  |
| Formula weight                    | 159.50                                           |                  |
| Temperature                       | 100(2) K                                         |                  |
| Wavelength                        | 0.71073 Å                                        |                  |
| Crystal system                    | Triclinic                                        |                  |
| Space group                       | P -1                                             |                  |
| Unit cell dimensions              | a = 4.5135(8) Å                                  | a = 89.141(12)°. |
|                                   | b = 7.7984(11) Å                                 | b = 80.887(14)°. |
|                                   | c = 7.8400(13) Å                                 | g = 84.090(13)°. |
| Volume                            | 271.02(8) Å <sup>3</sup>                         |                  |
| Z                                 | 2                                                |                  |
| Density (calculated)              | 1.954 Mg/m <sup>3</sup>                          |                  |
| Absorption coefficient            | 4.785 mm <sup>-1</sup>                           |                  |
| F(000)                            | 160                                              |                  |
| Crystal size                      | 0.18 x 0.11 x 0.05 mm <sup>3</sup>               |                  |
| Theta range for data collection   | 2.626 to 26.500°.                                |                  |
| Index ranges                      | -5 ≤ h ≤ 5, -8 ≤ k ≤ 9, -9 ≤ l ≤ 9               |                  |
| Reflections collected             | 2895                                             |                  |
| Independent reflections           | 1117 [R(int) = 0.0810]                           |                  |
| Completeness to theta = 25.242°   | 99.6 %                                           |                  |
| Absorption correction             | Semi-empirical from equivalents                  |                  |
| Max. and min. transmission        | 0.787 and 0.537                                  |                  |
| Refinement method                 | Full-matrix least-squares on F <sup>2</sup>      |                  |
| Data / restraints / parameters    | 1117 / 0 / 57                                    |                  |
| Goodness-of-fit on F <sup>2</sup> | 1.088                                            |                  |
| Final R indices [I > 2σ(I)]       | R1 = 0.0632, wR2 = 0.1609                        |                  |
| R indices (all data)              | R1 = 0.0701, wR2 = 0.1688                        |                  |
| Largest diff. peak and hole       | 1.568 and -1.647 e.Å <sup>-3</sup>               |                  |

This compound crystallizes as twins. Component 2 rotated by 3.1089% around [-0.20 -0.98 -0.08] (reciprocal) or [-0.39 -0.92 -0.02] (direct).

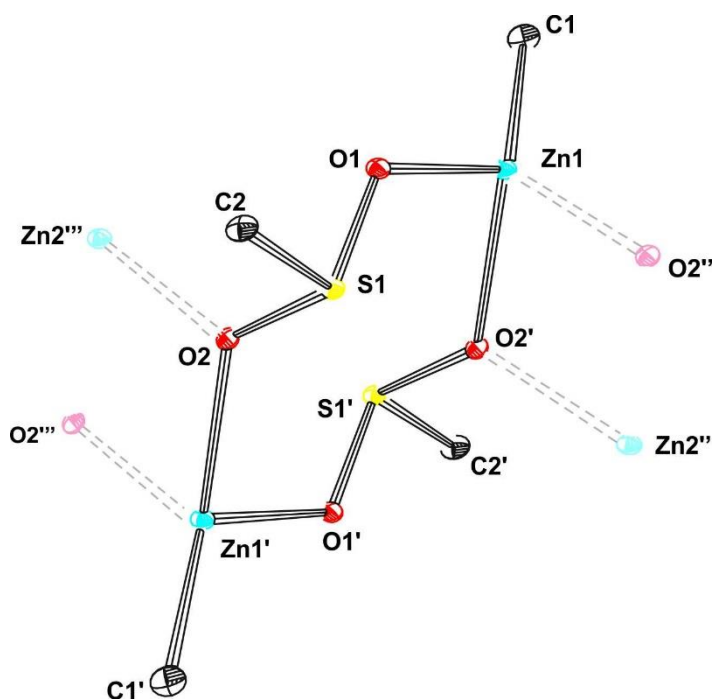

**Figure S17.** Molecular structure of **1** with thermal ellipsoids set at 40% probability. Hydrogen atoms have been omitted for clarity. Symmetry transformations used to generate equivalent atoms:  $(x+1,y,z)$ ;  $(-x+1,-y+1,-z+1)$ ;  $(3-x-1,y,z)$

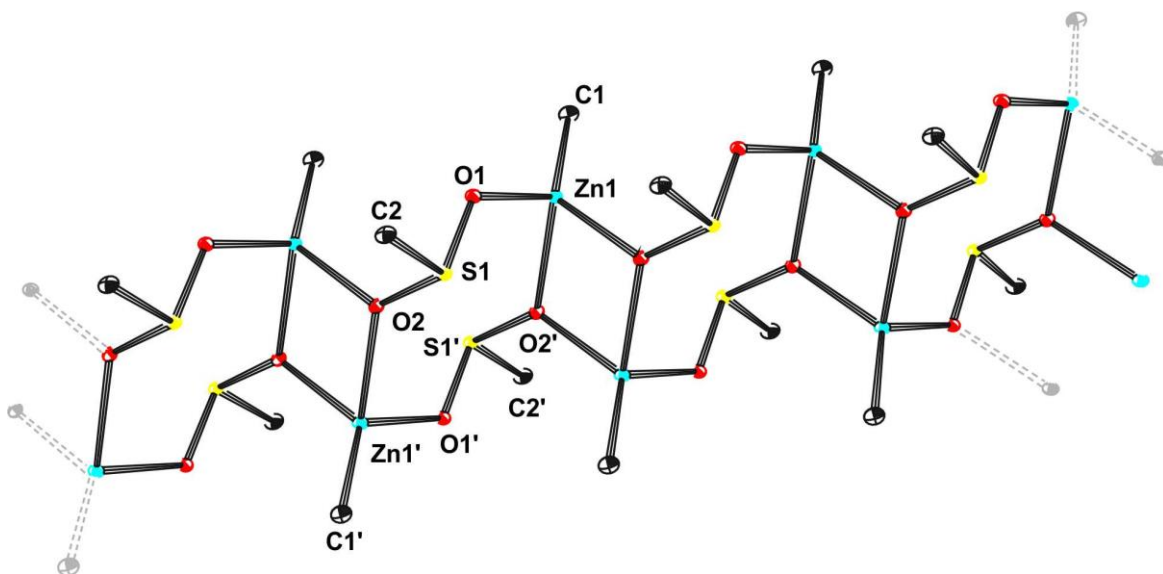

**Figure S18.** Chain structure of **1**.

**Table S5.** Selected intermolecular bond lengths [ $\text{\AA}$ ] and angles [ $^\circ$ ] for **1**.

---

|            |          |                 |           |
|------------|----------|-----------------|-----------|
| Zn1 – O1   | 1.998(4) | O1 – Zn1 – C1   | 124.8(2)  |
| Zn1 – O2'  | 2.096(4) | O1 – Zn1 – O2'  | 96.44(15) |
| Zn1 – O2'' | 2.075(4) | O1 – Zn1 – O2'' | 95.98(16) |
| Zn1 – C1   | 1.942(6) | O1 – S1 – O2    | 106.9(2)  |
| S1 – O1    | 1.517(4) | O1 – S1 – C2    | 100.5(2)  |
| S1 – O2    | 1.551(4) | O2 – S1 – C2    | 101.3(3)  |

---

## Crystal data for 2

**Table S6.** Crystal data and structure refinement for 2.

|                                   |                                                                               |                 |
|-----------------------------------|-------------------------------------------------------------------------------|-----------------|
| Empirical formula                 | C <sub>32</sub> H <sub>72</sub> O <sub>8</sub> S <sub>4</sub> Zn <sub>4</sub> |                 |
| Formula weight                    | 974.61                                                                        |                 |
| Temperature                       | 100(2) K                                                                      |                 |
| Wavelength                        | 0.71073 Å                                                                     |                 |
| Crystal system                    | Triclinic                                                                     |                 |
| Space group                       | P -1                                                                          |                 |
| Unit cell dimensions              | a = 11.9492(3) Å                                                              | a = 86.157(3)°. |
|                                   | b = 12.8183(7) Å                                                              | b = 78.812(2)°. |
|                                   | c = 16.1223(5) Å                                                              | g = 75.515(3)°. |
| Volume                            | 2345.05(16) Å <sup>3</sup>                                                    |                 |
| Z                                 | 2                                                                             |                 |
| Density (calculated)              | 1.380 Mg/m <sup>3</sup>                                                       |                 |
| Absorption coefficient            | 2.238 mm <sup>-1</sup>                                                        |                 |
| F(000)                            | 1024                                                                          |                 |
| Crystal size                      | 0.24 x 0.17 x 0.08 mm <sup>3</sup>                                            |                 |
| Theta range for data collection   | 2.390 to 26.997°.                                                             |                 |
| Index ranges                      | -15 ≤ h ≤ 15, -16 ≤ k ≤ 16, -17 ≤ l ≤ 20                                      |                 |
| Reflections collected             | 18888                                                                         |                 |
| Independent reflections           | 10221 [R(int) = 0.0340]                                                       |                 |
| Completeness to theta = 25.242°   | 99.9 %                                                                        |                 |
| Absorption correction             | Semi-empirical from equivalents                                               |                 |
| Refinement method                 | Full-matrix least-squares on F <sup>2</sup>                                   |                 |
| Data / restraints / parameters    | 10221 / 0 / 458                                                               |                 |
| Goodness-of-fit on F <sup>2</sup> | 1.019                                                                         |                 |
| Final R indices [I > 2σ(I)]       | R1 = 0.0374, wR2 = 0.0646                                                     |                 |
| R indices (all data)              | R1 = 0.0611, wR2 = 0.0720                                                     |                 |
| Largest diff. peak and hole       | 0.795 and -0.441 e.Å <sup>-3</sup>                                            |                 |

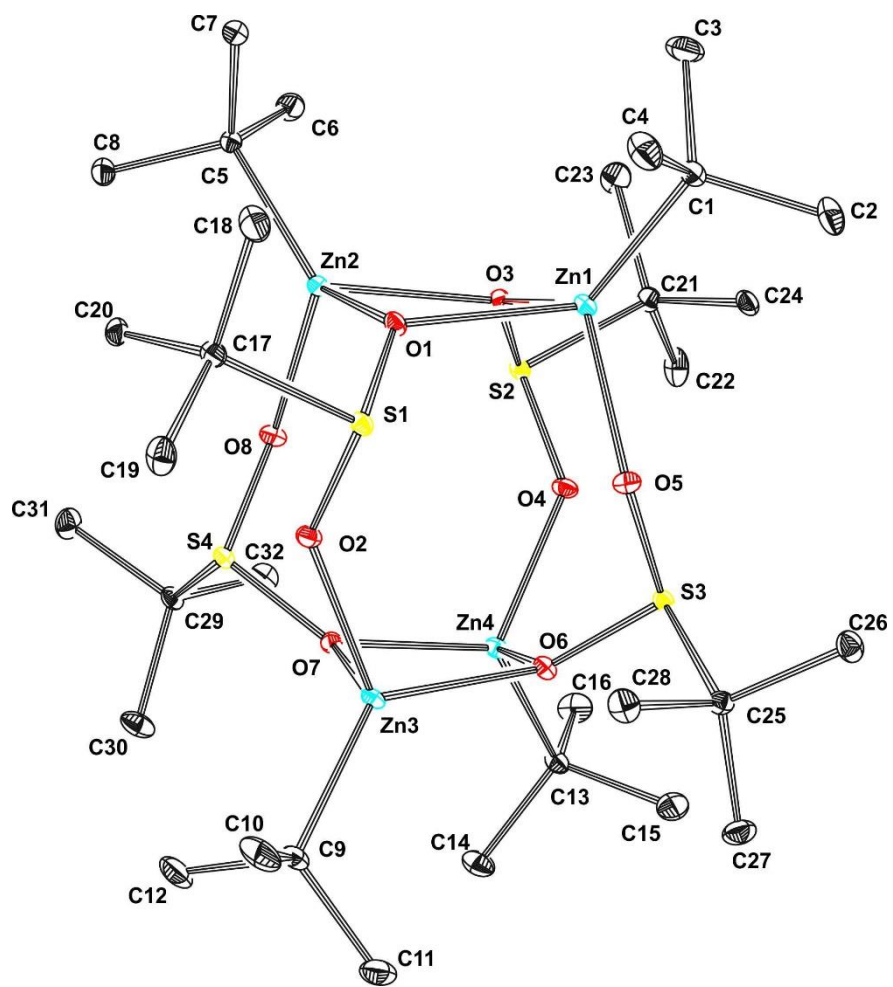

**Figure S19.** Molecular structure of **2** with thermal ellipsoids set at 34% probability. Hydrogen atoms have been omitted for clarity.



**Table S7.** Selected bond lengths [Å] and angles [°] for **2**.

|           |            |                |            |
|-----------|------------|----------------|------------|
| Zn1 – C1  | 1.993(3)   | C1 – Zn1 – O1  | 119.06(10) |
| Zn1 – O1  | 2.121(2)   | C1 – Zn1 – O3  | 129.44(10) |
| Zn1 – O3  | 2.074(2)   | C1 – Zn1 – O5  | 114.55(11) |
| Zn1 – O5  | 2.0181(17) | O1 – Zn1 – O3  | 78.64(8)   |
| Zn2 – C5  | 1.993(3)   | O1 – Zn1 – O5  | 92.89(8)   |
| Zn2 – O1  | 2.066(2)   | O3 – Zn1 – O5  | 110.87(7)  |
| Zn2 – O3  | 2.107(2)   | C5 – Zn2 – O1  | 129.46(10) |
| Zn2 – O8  | 2.0102(19) | C5 – Zn2 – O3  | 117.60(10) |
| Zn3 – C9  | 1.990(3)   | C5 – Zn2 – O8  | 114.74(11) |
| Zn3 – O2  | 2.0049(17) | O1 – Zn2 – O3  | 78.64(8)   |
| Zn3 – O6  | 2.060(2)   | O1 – Zn2 – O8  | 110.73(7)  |
| Zn3 – O7  | 2.1170(18) | O3 – Zn2 – O8  | 93.90(8)   |
| Zn4 – C13 | 1.991(3)   | C9 – Zn3 – O2  | 116.90(10) |
| Zn4 – O4  | 2.0054(18) | C9 – Zn3 – O6  | 129.86(10) |
| Zn4 – O6  | 2.1164(19) | C9 – Zn3 – O7  | 117.97(11) |
| Zn4 – O7  | 2.068(2)   | O2 – Zn3 – O6  | 108.48(8)  |
| S1 – C17  | 1.830(3)   | O2 – Zn3 – O7  | 91.85(7)   |
| S1 – O1   | 1.5543(18) | O6 – Zn3 – O7  | 79.08(8)   |
| S1 – O2   | 1.510(2)   | C13 – Zn4 – O4 | 116.85(10) |
| S2 – C21  | 1.831(3)   | C13 – Zn4 – O6 | 117.41(10) |
| S2 – O3   | 1.5552(19) | C13 – Zn4 – O7 | 128.59(11) |
| S2 – O4   | 1.5128(18) | O4 – Zn4 – O6  | 92.06(7)   |
| S3 – C25  | 1.836(3)   | O4 – Zn4 – O7  | 110.25(7)  |
| S3 – O5   | 1.5119(18) | O6 – Zn4 – O7  | 78.94(8)   |
| S3 – O6   | 1.548(2)   | C17 – S1 – O1  | 101.78(12) |
| S4 – C29  | 1.831(3)   | C17 – S1 – O2  | 101.58(13) |
| S4 – O7   | 1.551(2)   | O1 – S1 – O2   | 107.10(11) |
| S4 – O8   | 1.5154(18) | C21 – S2 – O3  | 101.77(13) |
|           |            | C21 – S2 – O4  | 101.72(13) |
|           |            | O3 – S2 – O4   | 107.14(10) |
|           |            | C25 – S3 – O5  | 102.15(12) |
|           |            | C25 – S3 – O6  | 101.51(12) |
|           |            | O5 – S3 – O6   | 108.24(12) |
|           |            | C29 – S4 – O7  | 101.85(12) |
|           |            | C29 – S4 – O8  | 102.11(12) |
|           |            | O7 – S4 – O8   | 107.40(12) |

### Crystal data for 3

**Table S8.** Crystal data and structure refinement for 3.

|                                   |                                             |                              |
|-----------------------------------|---------------------------------------------|------------------------------|
| Empirical formula                 | $C_{32}H_{36}O_6S_2Zn_2$                    |                              |
| Formula weight                    | 711.47                                      |                              |
| Temperature                       | 100(2) K                                    |                              |
| Wavelength                        | 0.71073 Å                                   |                              |
| Crystal system                    | Triclinic                                   |                              |
| Space group                       | P -1                                        |                              |
| Unit cell dimensions              | $a = 8.792(5)$ Å                            | $\alpha = 78.722(5)^\circ$ . |
|                                   | $b = 9.326(5)$ Å                            | $\beta = 74.655(5)^\circ$ .  |
|                                   | $c = 10.669(5)$ Å                           | $\gamma = 67.772(5)^\circ$ . |
| Volume                            | $776.4(7)$ Å <sup>3</sup>                   |                              |
| Z                                 | 1                                           |                              |
| Density (calculated)              | 1.522 Mg/m <sup>3</sup>                     |                              |
| Absorption coefficient            | 1.722 mm <sup>-1</sup>                      |                              |
| F(000)                            | 368                                         |                              |
| Crystal size                      | 0.21 x 0.16 x 0.07 mm <sup>3</sup>          |                              |
| Theta range for data collection   | 2.373 to 30.163°.                           |                              |
| Index ranges                      | -12 ≤ h ≤ 11, -12 ≤ k ≤ 12, -14 ≤ l ≤ 15    |                              |
| Reflections collected             | 6161                                        |                              |
| Independent reflections           | 3931 [R(int) = 0.0293]                      |                              |
| Completeness to theta = 25.242°   | 99.9 %                                      |                              |
| Absorption correction             | Semi-empirical from equivalents             |                              |
| Max. and min. transmission        | 0.886 and 0.726                             |                              |
| Refinement method                 | Full-matrix least-squares on F <sup>2</sup> |                              |
| Data / restraints / parameters    | 3931 / 0 / 190                              |                              |
| Goodness-of-fit on F <sup>2</sup> | 1.050                                       |                              |
| Final R indices [I > 2σ(I)]       | R1 = 0.0361, wR2 = 0.0826                   |                              |
| R indices (all data)              | R1 = 0.0449, wR2 = 0.0872                   |                              |
| Largest diff. peak and hole       | 0.652 and -0.495 e. Å <sup>-3</sup>         |                              |

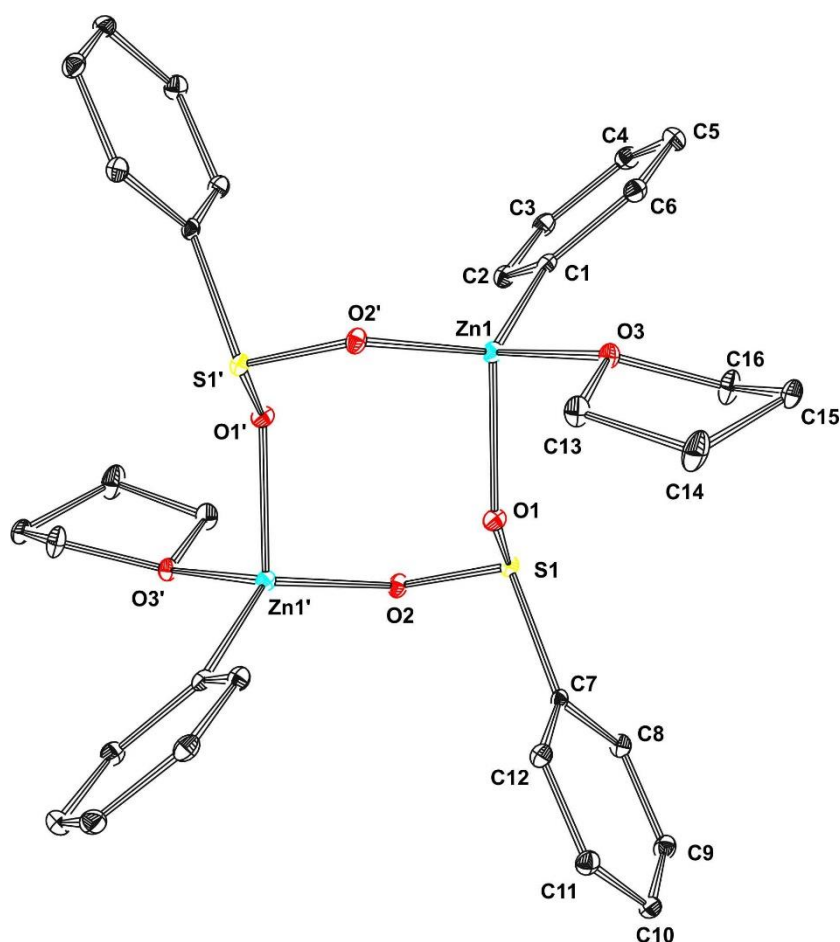

**Figure. S20.** Molecular structure of **3** with thermal ellipsoids set at 40% probability. Hydrogen atoms have been omitted for clarity. Symmetry transformations used to generate equivalent atoms:  $(-x, -y+1, -z+2)$

**Table S9.** Selected bond lengths [ $\text{\AA}$ ] and angles [ $^\circ$ ] for **3**.

|           |            |                |            |
|-----------|------------|----------------|------------|
| Zn1 – C1  | 1.960(2)   | C1 – Zn1 – O1  | 118.20(8)  |
| Zn1 – O1  | 2.0264(16) | C1 – Zn1 – O2' | 133.46(8)  |
| Zn1 – O3  | 2.0881(17) | C1 – Zn1 – O3  | 112.11(8)  |
| Zn1 – O2' | 1.9869(17) | O1 – Zn1 – O2' | 97.77(7)   |
| S1 – C7   | 1.788(2)   | O1 – Zn1 – O3  | 92.88(7)   |
| S1 – O1   | 1.5273(17) | C7 – S1 – O1   | 100.93(10) |
| S1 – O2   | 1.5281(18) | C7 – S1 – O2   | 103.94(9)  |
|           |            | O1 – S1 – O2   | 107.37(9)  |
|           |            | S1 – O1 – Zn1  | 120.52(10) |
|           |            | S1 – O2 – Zn1' | 119.74(9)  |

### III. Theoretical section

#### Coordinates of the calculated molecular systems

##### 1. Me<sub>2</sub>Zn/SO<sub>2</sub>

|    |             |             |             |
|----|-------------|-------------|-------------|
| Zn | -1.29130800 | 0.16562900  | 0.00016900  |
| C  | -2.01222400 | -1.64583500 | 0.00124700  |
| H  | -3.10654100 | -1.64681600 | 0.00588600  |
| H  | -1.67680900 | -2.19276000 | -0.88570400 |
| S  | 2.29682700  | -0.11423300 | -0.00136000 |
| O  | 1.60358500  | -0.40075900 | -1.24175900 |
| O  | 1.60957800  | -0.39735700 | 1.24311800  |
| C  | -0.62167200 | 2.00501900  | -0.00062100 |
| H  | -0.00861400 | 2.19552600  | 0.88657400  |
| H  | -0.01085500 | 2.19551100  | -0.88936600 |
| H  | -1.43979700 | 2.73174700  | 0.00042100  |
| H  | -1.66931600 | -2.19452000 | 0.88424100  |

##### 2. Me<sub>2</sub>Zn--SO<sub>2</sub>\*

|    |             |             |             |
|----|-------------|-------------|-------------|
| Zn | -0.94452000 | -0.00229200 | -0.02893400 |
| C  | -2.86143700 | -0.24567400 | 0.23190300  |
| H  | -3.04776100 | -1.15745900 | 0.80286400  |
| H  | -3.28642700 | 0.60637000  | 0.76664200  |
| S  | 1.66835600  | -0.23587000 | -0.35902100 |
| O  | 2.52429200  | -0.03249800 | 0.80344100  |
| O  | 0.60865400  | -1.31685100 | -0.13564200 |
| C  | 0.37286400  | 1.76213200  | -0.12119800 |
| H  | 0.39794200  | 1.97815800  | 0.95167400  |
| H  | 1.27474600  | 2.17549800  | -0.56934000 |
| H  | -0.47179000 | 2.26809400  | -0.60773400 |
| H  | -3.35691800 | -0.33195000 | -0.73836100 |

##### 3. (MeSO<sub>2</sub>)ZnMe

|    |             |             |             |
|----|-------------|-------------|-------------|
| Zn | -1.02223400 | -0.00797400 | -0.00814600 |
| C  | -2.93418400 | 0.01613100  | 0.34482500  |
| H  | -3.25768700 | 1.02119100  | 0.62519300  |
| H  | -3.48740000 | -0.29193400 | -0.54598400 |
| S  | 1.58748700  | 0.00010100  | -0.51449300 |
| O  | 0.61048400  | 1.20092900  | -0.33193200 |
| O  | 0.61214100  | -1.20197500 | -0.31564400 |
| C  | 2.50167700  | 0.00956500  | 1.05374600  |
| H  | 3.11993500  | -0.88877400 | 1.09113300  |
| H  | 3.12162800  | 0.90717100  | 1.07901500  |
| H  | 1.76481800  | 0.01586600  | 1.85855700  |
| H  | -3.18002600 | -0.67170500 | 1.15752800  |

##### 4. <sup>t</sup>Bu<sub>2</sub>Zn/SO<sub>2</sub>

|    |             |             |             |
|----|-------------|-------------|-------------|
| Zn | -0.24793000 | -0.61336200 | -0.01597700 |
| C  | -2.20665700 | -0.24406400 | -0.02142400 |
| S  | 1.14543500  | 2.57578000  | 0.16347900  |

|   |             |             |             |
|---|-------------|-------------|-------------|
| O | 0.47234500  | 1.71866500  | 1.12838500  |
| O | 0.73193600  | 2.47588800  | -1.22147500 |
| C | 1.62391400  | -1.33862600 | -0.02804000 |
| C | 1.59833200  | -2.59414300 | -0.91890200 |
| H | 1.35506300  | -2.35674600 | -1.95984900 |
| H | 2.58419200  | -3.08659100 | -0.91992100 |
| H | 0.87085500  | -3.33375100 | -0.56833100 |
| C | -2.51638100 | 1.06015800  | -0.76824600 |
| H | -2.18423100 | 1.03160000  | -1.81084800 |
| H | -3.60235900 | 1.24836700  | -0.77594900 |
| H | -2.04233100 | 1.92477500  | -0.29502500 |
| C | 2.00184000  | -1.74151000 | 1.40527700  |
| H | 2.99576200  | -2.21781000 | 1.42511400  |
| H | 2.04158700  | -0.87743500 | 2.07624000  |
| H | 1.29470700  | -2.46057400 | 1.83256600  |
| C | -2.69319300 | -0.11730900 | 1.43047800  |
| H | -3.77610400 | 0.08708400  | 1.45769400  |
| H | -2.52604800 | -1.03543300 | 2.00422000  |
| H | -2.19525700 | 0.70175800  | 1.95908600  |
| C | 2.67794000  | -0.37358400 | -0.57152400 |
| H | 3.67028500  | -0.85231000 | -0.58693800 |
| H | 2.45941100  | -0.04074500 | -1.59045100 |
| H | 2.79082700  | 0.51730100  | 0.05982900  |
| C | -2.95060500 | -1.40293100 | -0.70367300 |
| H | -4.03795100 | -1.22276100 | -0.69444500 |
| H | -2.65352500 | -1.52367400 | -1.75083100 |
| H | -2.77931300 | -2.35903500 | -0.19746500 |

#### 5. <sup>t</sup>Bu<sub>2</sub>Zn--SO<sub>2</sub>\*

|    |             |             |             |
|----|-------------|-------------|-------------|
| Zn | -0.40137400 | -0.25040200 | -0.16399800 |
| C  | -2.36573400 | -0.01529700 | 0.09251800  |
| S  | 1.91482300  | -1.26337300 | -0.33883800 |
| O  | 2.51231600  | -1.46704100 | 0.98782200  |
| O  | 0.57217700  | -2.00453800 | -0.50073700 |
| C  | 1.36359700  | 1.26611200  | -0.02227100 |
| C  | 0.48719300  | 2.25222000  | -0.81057100 |
| H  | 0.46113800  | 2.01858600  | -1.87922900 |
| H  | -0.54049500 | 2.31292000  | -0.44681600 |
| H  | 0.91885600  | 3.26178500  | -0.71898300 |
| C  | 2.80156400  | 1.42246000  | -0.49876500 |
| H  | 3.50504000  | 0.80481900  | 0.06266400  |
| H  | 2.91192800  | 1.19588200  | -1.56308000 |
| H  | 3.10578200  | 2.46919800  | -0.35497200 |
| C  | -2.98379100 | 0.51448700  | -1.20855200 |
| H  | -4.07331100 | 0.61880300  | -1.08922500 |
| H  | -2.59451300 | 1.49935800  | -1.48387800 |
| H  | -2.81503400 | -0.16271000 | -2.05143600 |
| C  | -2.65725900 | 0.96048900  | 1.23779700  |
| H  | -3.74484700 | 1.06691900  | 1.37053000  |
| H  | -2.24778000 | 0.61273500  | 2.19091500  |
| H  | -2.25921600 | 1.96163400  | 1.04612700  |

|   |             |             |             |
|---|-------------|-------------|-------------|
| C | 1.26340700  | 1.42956500  | 1.48587000  |
| H | 0.22896300  | 1.49094100  | 1.83742300  |
| H | 1.76176100  | 0.60552400  | 2.00752100  |
| H | 1.76671600  | 2.35729300  | 1.79908900  |
| C | -2.95700000 | -1.39297500 | 0.42236100  |
| H | -4.04815600 | -1.31293200 | 0.54530500  |
| H | -2.76822600 | -2.12237800 | -0.37015100 |
| H | -2.55233600 | -1.80207600 | 1.35254100  |

#### 6. (<sup>t</sup>BuSO<sub>2</sub>)Zn<sup>t</sup>Bu

|    |             |             |             |
|----|-------------|-------------|-------------|
| Zn | 0.91662600  | -0.31419100 | 0.01647200  |
| C  | 2.81288900  | 0.26283900  | 0.00417100  |
| S  | -1.63732900 | -1.04983500 | -0.04680400 |
| O  | -0.68018600 | -0.85655100 | 1.17382600  |
| O  | -0.66472700 | -0.75471900 | -1.23057600 |
| C  | -2.71940800 | 0.47540200  | 0.01319600  |
| C  | -1.84181500 | 1.71952300  | 0.07429300  |
| H  | -1.22072000 | 1.72046200  | 0.97293000  |
| H  | -1.20148400 | 1.79467700  | -0.80759300 |
| H  | -2.47692900 | 2.60981400  | 0.10457300  |
| C  | 2.94340700  | 1.53853400  | -0.84203200 |
| H  | 2.35555800  | 2.36672000  | -0.43347800 |
| H  | 3.99407400  | 1.86792800  | -0.86841400 |
| H  | 2.62642000  | 1.38091900  | -1.87759800 |
| C  | 3.28316300  | 0.54992200  | 1.43717100  |
| H  | 3.21906000  | -0.33524200 | 2.07728600  |
| H  | 4.33564300  | 0.87447200  | 1.43160400  |
| H  | 2.70062400  | 1.34647000  | 1.91052100  |
| C  | -3.56237800 | 0.43108000  | -1.26325600 |
| H  | -4.13874400 | -0.49658300 | -1.33041600 |
| H  | -4.27174900 | 1.26414700  | -1.26205700 |
| H  | -2.93430600 | 0.51278700  | -2.15249300 |
| C  | -3.58117900 | 0.31928100  | 1.26809800  |
| H  | -4.28959300 | 1.15073700  | 1.33115900  |
| H  | -4.15937600 | -0.60933300 | 1.24364300  |
| H  | -2.96631000 | 0.31972500  | 2.17016400  |
| C  | 3.68428700  | -0.84375800 | -0.60863200 |
| H  | 3.39287800  | -1.07635100 | -1.63749200 |
| H  | 4.73793900  | -0.52356700 | -0.63206300 |
| H  | 3.64100900  | -1.77146000 | -0.02965700 |

#### 7. Ph<sub>2</sub>Zn/SO<sub>2</sub>

|    |             |             |             |
|----|-------------|-------------|-------------|
| Zn | -0.51942600 | -0.67374800 | 0.07201200  |
| S  | 1.95022200  | 1.96726400  | -0.40469400 |
| O  | 0.49430500  | 2.01898400  | -0.34109300 |
| O  | 2.67899300  | 2.87266600  | 0.46174100  |
| C  | -2.41406900 | -0.31200200 | 0.04308000  |
| C  | -3.36803500 | -1.33023400 | 0.22227300  |
| C  | -2.89293500 | 0.99549300  | -0.15891600 |
| C  | -4.73718800 | -1.05968300 | 0.20050900  |

|   |             |             |             |
|---|-------------|-------------|-------------|
| H | -3.04798300 | -2.35555200 | 0.38283500  |
| C | -4.26061100 | 1.27332000  | -0.18154900 |
| H | -2.19240400 | 1.81184400  | -0.29946400 |
| C | -5.18610700 | 0.24525700  | -0.00206200 |
| H | -5.45083000 | -1.86425900 | 0.34141600  |
| H | -4.60293600 | 2.29053500  | -0.33834100 |
| H | -6.24891200 | 0.45919700  | -0.01915200 |
| C | 3.42855500  | -1.78349200 | -1.04182900 |
| C | 2.03930000  | -1.65041700 | -1.00046100 |
| C | 1.38589700  | -1.06343500 | 0.09743300  |
| C | 2.19850600  | -0.62970400 | 1.16589500  |
| C | 3.59006100  | -0.76300500 | 1.13550500  |
| C | 4.20846000  | -1.33525100 | 0.02561800  |
| H | 3.90320600  | -2.23279100 | -1.90738700 |
| H | 1.46311900  | -2.00298300 | -1.85054600 |
| H | 1.74601100  | -0.17629600 | 2.04325100  |
| H | 4.18524700  | -0.41422000 | 1.97190300  |
| H | 5.28732800  | -1.43352200 | -0.00794300 |

#### 8. Ph<sub>2</sub>Zn--SO<sub>2</sub>\*

|    |             |             |             |
|----|-------------|-------------|-------------|
| Zn | -0.29207100 | 0.22254900  | -0.10350800 |
| S  | 1.70151600  | 2.06268700  | -0.20540900 |
| O  | 0.24524300  | 2.23200900  | -0.59317000 |
| O  | 1.97359500  | 2.44137200  | 1.18067100  |
| C  | -2.16855300 | -0.22096700 | 0.00530900  |
| C  | -2.61594600 | -1.52811300 | 0.25642800  |
| C  | -3.13253100 | 0.78539600  | -0.17026500 |
| C  | -3.97872200 | -1.82207200 | 0.32926600  |
| H  | -1.90133600 | -2.33255900 | 0.39866300  |
| C  | -4.49620600 | 0.49587400  | -0.09803400 |
| H  | -2.82109900 | 1.80649100  | -0.36402800 |
| C  | -4.92099700 | -0.80906300 | 0.15183900  |
| H  | -4.30335700 | -2.83836800 | 0.52440300  |
| H  | -5.22452500 | 1.28757400  | -0.23577300 |
| H  | -5.97983800 | -1.03517400 | 0.20864600  |
| C  | 3.06741800  | -1.94013000 | -1.23152200 |
| C  | 2.15364100  | -0.89033200 | -1.25930400 |
| C  | 1.73621600  | -0.25552600 | -0.06873700 |
| C  | 2.32262600  | -0.67037700 | 1.14267800  |
| C  | 3.23273000  | -1.72248000 | 1.17667400  |
| C  | 3.60314700  | -2.35941700 | -0.01115500 |
| H  | 3.36922500  | -2.42482700 | -2.15292700 |
| H  | 1.75930800  | -0.56025000 | -2.21643400 |
| H  | 2.07924000  | -0.14228300 | 2.05940500  |
| H  | 3.66771600  | -2.03606400 | 2.11870300  |
| H  | 4.32490100  | -3.16779900 | 0.01204700  |

#### 9. (PhSO<sub>2</sub>)ZnPh

|    |             |             |             |
|----|-------------|-------------|-------------|
| Zn | -0.82077500 | -0.64417400 | -0.01431400 |
| S  | 1.64757000  | -1.51345700 | -0.41743500 |

|   |             |             |             |
|---|-------------|-------------|-------------|
| O | 0.64331000  | -0.94776900 | -1.45858700 |
| O | 0.76143600  | -1.49528100 | 0.87793200  |
| C | 2.76996200  | -0.12607300 | -0.13374600 |
| C | 3.86350100  | -0.33959200 | 0.70424500  |
| C | 2.54814700  | 1.10785000  | -0.73778600 |
| C | 4.73755800  | 0.71394200  | 0.96248900  |
| H | 4.02392600  | -1.31194700 | 1.15701300  |
| C | 3.42874500  | 2.15702200  | -0.47539700 |
| H | 1.70485800  | 1.23103700  | -1.40560500 |
| C | 4.51857600  | 1.96127500  | 0.37395200  |
| H | 5.58687900  | 0.56243500  | 1.61795900  |
| H | 3.26732200  | 3.12324200  | -0.93867200 |
| H | 5.20210000  | 2.77840300  | 0.57241100  |
| C | -2.61887000 | 0.04361200  | 0.09369500  |
| C | -3.28241400 | 0.49071400  | -1.06199800 |
| C | -3.30933300 | 0.12481400  | 1.31517100  |
| C | -4.58159300 | 0.99771600  | -1.00214600 |
| H | -2.78675200 | 0.44521100  | -2.02650700 |
| C | -4.60847200 | 0.63095900  | 1.38132900  |
| H | -2.83556500 | -0.20904500 | 2.23268200  |
| C | -5.24739200 | 1.06865300  | 0.22125400  |
| H | -5.07231600 | 1.33538500  | -1.90844300 |
| H | -5.12021200 | 0.68290600  | 2.33608800  |
| H | -6.25655600 | 1.46193400  | 0.27031000  |

---

<sup>[i]</sup> M. Nilsson, *J. Magn. Res.* **2009**, *2*, 296-302.

<sup>[ii]</sup> R. Neufeld and D. Stalke, *Chem. Sci.* **2015**, *6*, 3354–3364.

<sup>[iii]</sup> S. Bachmann, R. Neufeld, M. Dzemski and D. Stalke, *Chem. Eur. J.* **2016**, *22*, 8462–8465.

<sup>[iv]</sup> A. K. Kreyenschmidt, S. Bachmann, T. Niklas and D. Stalke, *ChemistrySelect*, **2017**, *2*, 6957–6960.
